# Supplementary material
Source: PubMed Central journal article supplement (PMC2630105)
Supplement: 0812043106_0812043106SI.pdf [file 0812043106_0812043106SI.pdf]

# Supporting Information

Xu et al. 10.1073/pnas.0812043106

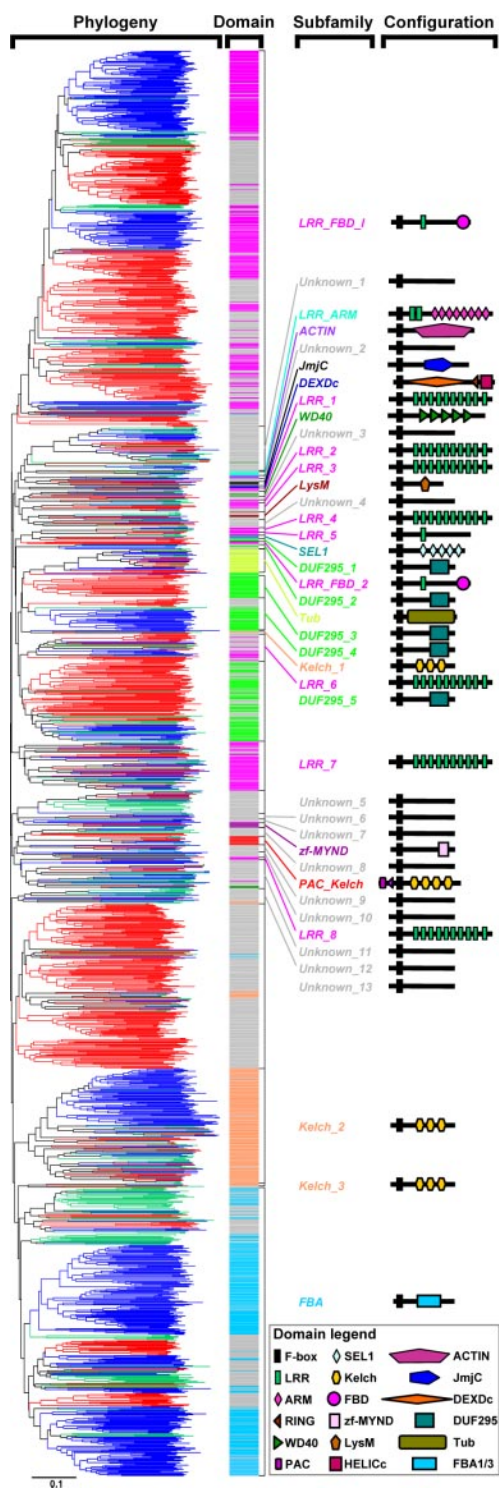

**Fig. S1.** Phylogenetic relationships and domain configurations of F-box proteins from Arabidopsis, poplar, and rice. The NJ tree was generated using the F-box domain only, and the sequences from Arabidopsis, poplar, and rice are color-coded blue, green, and red, respectively. The family designations are based on the presence of certain C-terminal domains.

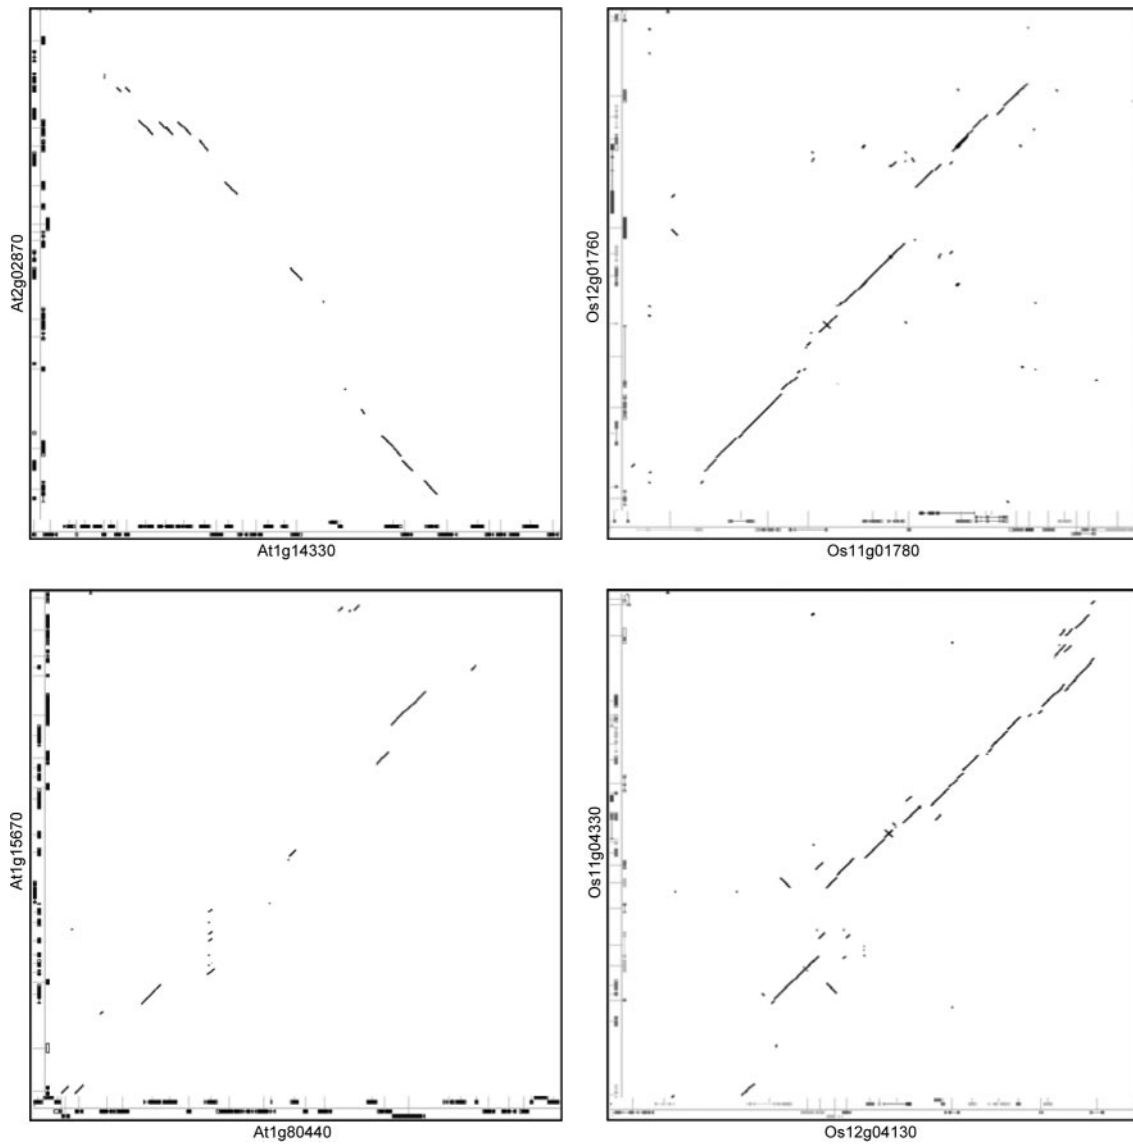

Fig. S2. Evidence for segmental gene duplication.









**Table S1. Evolutionarily conserved F-box genes in Arabidopsis, poplar, and rice**

| Subfamily                                                                                      | <i>Arabidopsis thaliana</i> | <i>Oryza sativa</i>              | <i>Populus trichocarpa</i>          | Domain        |
|------------------------------------------------------------------------------------------------|-----------------------------|----------------------------------|-------------------------------------|---------------|
| 20 evolutionarily highly conserved gene clusters, with one copy in each species                |                             |                                  |                                     |               |
| DEXDc                                                                                          | At3g54460                   | Os01g72310                       | fgenes1_pg.C.LG.III001684           | DEXDc+HELICc  |
| JmjC                                                                                           | At5g06550                   | Os11g36450                       | eugene3.00160584                    | JmjC          |
| Kelch_2                                                                                        | At1g30090                   | Os07g05880                       | eugene3.00061201                    | Kelch repeats |
|                                                                                                | At2g24540 ARF               | Os06g44500                       | estExt_fgenes1_pm.v1.C.LG.XVIII0193 | Kelch repeats |
| LRR_7                                                                                          | At3g61350                   | Os02g02350                       | eugene3.00140290                    | Kelch repeats |
|                                                                                                | At2g42620 ORE9              | Os06g06050                       | fgenes1_pg.C.LG.XIV000831           | LRR repeats   |
|                                                                                                | At3g07550                   | Os11g16280                       | eugene3.00031484                    | LRR repeats   |
| LRR_8                                                                                          | At3g54480 SKIP5             | Os07g46560                       | grail3.0100009701                   | N (Unknown)   |
|                                                                                                | At2g17020                   | Os03g04270                       | eugene3.00041397                    | LRR repeats   |
| LRR_FBD                                                                                        | At2g39490                   | Os06g47100                       | fgenes1_pg.C.LG.VIII000419          | N (Unknown)   |
|                                                                                                | At4g03220                   | Os02g06520                       | fgenes1_pg.C.LG.XIII001178          | LRR+FBD       |
| LysM                                                                                           | At5g48170 SNE               | Os03g10040                       | eugene3.00141133                    | N (Unknown)   |
| TUB                                                                                            | At2g18280                   | Os02g47640                       | fgenes1_pg.C.LG.II000315            | TUB           |
| Unknown_2                                                                                      | At1g06110                   | Os11g16330                       | eugene3.00640134                    | N (Unknown)   |
| Unknown_4                                                                                      | At5g45360                   | Os06g49530                       | eugene3.00860161                    | N (Unknown)   |
| Unknown_10                                                                                     | At3g26000                   | Os04g40910                       | fgenes1_pg.C.LG.I002238             | N (Unknown)   |
|                                                                                                | At3g27290                   | Os08g33140                       | fgenes1_pg.C.LG.X001010             | N (Unknown)   |
| Unknown_11                                                                                     | At5g21040                   | Os04g52870                       | eugene3.00090125                    | WD40 repeats  |
| Unknown_13                                                                                     | At5g03970                   | Os05g18660                       | fgenes1_pg.C.scaffold.201000011     | N (Unknown)   |
| WD40                                                                                           | At5g52880                   | Os05g45040                       | fgenes1_pg.C.LG.XII000097           | WD40 repeats  |
| 63 evolutionarily less conserved gene clusters, with no more than three copies in each species |                             |                                  |                                     |               |
| JmjC                                                                                           | At1g78280                   | Os03g27250                       |                                     | JmjC          |
| Kelch_3                                                                                        |                             | Os01g45900                       | fgenes1_pg.C.scaffold.215000004     | N (Unknown)   |
|                                                                                                | At3g48880                   | Os10g35920                       |                                     | N (Unknown)   |
| LRR_6                                                                                          | At1g10780                   | Os09g28120                       |                                     | N (Unknown)   |
| LRR_7                                                                                          |                             | Os04g42670                       | grail3.0023014901                   | LRR repeats   |
| LRR_ARM                                                                                        |                             | Os05g30920                       | grail3.0009050801                   | N (Unknown)   |
| LRR_FBD                                                                                        | At1g08710                   | Os01g59910                       |                                     | N (Unknown)   |
| LRR_FBD                                                                                        | At3g58910                   | Os01g57920                       |                                     | LRR           |
| Unknown_12                                                                                     | At3g20270                   | Os09g32240                       |                                     | N (Unknown)   |
| Unknown_13                                                                                     | At1g10890                   | Os07g04750                       |                                     | N (Unknown)   |
| Unknown_13                                                                                     |                             | Os02g33840                       | eugene3.00090359                    | N (Unknown)   |
| Unknown_4                                                                                      | At5g39250                   | Os03g30920                       |                                     | N (Unknown)   |
| Unknown_8                                                                                      |                             | Os03g12940                       | fgenes1_pg.C.LG.I003152             | N (Unknown)   |
| ACTIN                                                                                          | At5g56180 ARP8              | Os04g57210                       | fgenes1_pm.C.LG.I001101             | ACTIN         |
|                                                                                                |                             |                                  | estExt_Genewise1.v1.C.LG.I6254      |               |
| FBA                                                                                            | At1g33010                   | Os12g42360 Os12g42340 Os12g42350 |                                     | N (Unknown)   |
| FBA                                                                                            | At5g41720                   | Os08g43530                       | eugene3.34310001                    | N (Unknown)   |
| FBA                                                                                            |                             | Os09g20650                       | eugene3.00150253                    |               |
|                                                                                                |                             |                                  | eugene3.00070156                    | FBA           |
|                                                                                                |                             |                                  | eugene3.00290314                    |               |
| FBA                                                                                            |                             | Os02g35560 Os07g16420 Os07g16800 | fgenes1_pg.C.LG.VII000684           | N (Unknown)   |
| FBA                                                                                            |                             | Os01g28150 Os01g28300            | eugene3.00081534                    | N (Unknown)   |
| FBA                                                                                            |                             | Os02g54240                       | eugene3.00131008                    | FBA           |
| Kelch_1                                                                                        | At1g23390                   | Os01g50840 Os09g12150            | fgenes1_pg.C.scaffold.125000065     | Kelch         |
|                                                                                                | At1g14330 At2g02870         | Os02g51350                       | eugene3.00100609                    | Kelch repeats |
| Kelch_2                                                                                        | At1g15670 At1g80440         | Os02g11790 Os06g39370            | fgenes1_pm.C.LG.I000404             | Kelch repeats |
| Kelch_2                                                                                        | At1g22040                   | Os02g36520 Os10g21930            | grail3.0002006301                   | Kelch repeats |
| Kelch_2                                                                                        | At1g55270                   | Os10g26990 Os03g07160            | eugene3.00010072                    | Kelch repeats |
|                                                                                                |                             |                                  | eugene3.00031859                    |               |
| Kelch_2                                                                                        | At1g67480                   | Os02g30210 Os04g31120            | eugene3.00410162                    | Kelch repeats |
|                                                                                                |                             |                                  | grail3.0036011001                   |               |
|                                                                                                |                             |                                  | eugene3.00081637                    |               |
| Kelch_2                                                                                        | At1g76920                   | Os04g59010                       | eugene3.00050973                    | Kelch repeats |
| Kelch_2                                                                                        |                             |                                  | eugene3.00020650                    |               |
|                                                                                                | At3g63220                   | Os10g24900                       | fgenes1_pm.C.LG.II000225            | Kelch repeats |
| Kelch_2                                                                                        |                             |                                  | eugene3.00051189                    |               |
|                                                                                                | At4g03030                   | Os02g21110                       | estExt_Genewise1.v1.C.LG.II2588     | Kelch repeats |
| Kelch_2                                                                                        | At5g26960                   | Os11g04330 Os12g04130            | fgenes1_pg.C.LG.V001366             | Kelch repeats |
|                                                                                                |                             | Os03g30160                       | eugene3.00011803                    | Kelch repeats |

| Subfamily  | <i>Arabidopsis thaliana</i>                | <i>Oryza sativa</i>          | <i>Populus trichocarpa</i>                                          | Domain            |
|------------|--------------------------------------------|------------------------------|---------------------------------------------------------------------|-------------------|
| Kelch_2    | At5g60570                                  | Os04g52830                   | fgenes1_pg.C.LG.XIII000754<br>fgenes1_pm.C.LG.XIX000107             | Kelch repeats     |
| LRR_1      | At4g33210                                  | Os10g25680                   | fgenes1_pg.C.LG.VI001526<br>fgenes1_pg.C.LG.XVIII000231             | LRR repeats       |
| LRR_2      | At5g67140                                  | Os06g07000                   | fgenes1_pm.C.LG.VII000276<br>grail3.0027007101                      | LRR repeats       |
| LRR_3      | At1g21760 AtFBP7                           | Os04g35190                   | estExt_fgenes1_pg.v1.C.LG.II1921<br>eugene3.00050859                | N (Unknown)       |
| LRR_3      | At3g54650                                  | <b>Os03g43390 Os12g40860</b> | eugene3.00051255<br>fgenes1_pg.C.LG.II000408                        | LRR repeats       |
| LRR_4      | <b>At1g21410 At1g77000</b>                 | <b>Os01g65920 Os05g35110</b> | estExt_fgenes1_pg.v1.C.LG.V1038<br>estExt_fgenes1_pm.v1.C.LG.II0833 | LRR repeats       |
| LRR_5      | At1g67190                                  | Os01g64030                   | fgenes1_pg.C.LG.IX000059<br>grail3.0066013301                       | LRR repeats       |
| LRR_6      | At4g08980                                  | <b>Os02g52130 Os06g11630</b> | estExt_fgenes1_pg.v1.C.LG.II1760                                    | LRR repeats       |
| LRR_7      | At2g39940 COI1                             | <b>Os05g37690 Os01g63420</b> |                                                                     | LRR repeats       |
| LRR_7      | <b>At3g50080 VFB2 At5g67250 SKIP2/VFB4</b> | Os09g02530                   | grail3.0019001201 grail3.0027009201                                 | LRR repeats       |
| LRR_7      | At3g62980 TIR1 At3g26810 AFB2              | Os04g32460                   | fgenes1_pg.C.LG.XIV001459<br>fgenes1_pg.C.LG.XIV000748              | LRR repeats       |
| LRR_7      | <b>At4g24390 At5g49980</b>                 | Os02g52230                   |                                                                     | LRR repeats       |
| LRR_7      | At5g01720                                  | <b>Os12g01760 Os11g01780</b> | eugene3.00060921<br>eugene3.00161229                                | LRR repeats       |
| PAC_Kelch  | At1g68050 FKF1                             | Os11g34460                   | estExt_fgenes1_pm.v1.C.LG.X0330<br>fgenes1_pm.C.LG.VIII000539       | PAC+Kelch repeats |
| PAC_Kelch  | <b>At2g18915 LKP2 At5g57360 ZTL</b>        | <b>Os02g05700 Os06g47890</b> | fgenes1_pm.C.LG.XVIII000262<br>estExt_fgenes1_pm.v1.C.1210015       | PAC+Kelch repeats |
| SEL1       | At1g70590                                  | Os04g40030                   | grail3.0036022401<br>fgenes1_pg.C.LG.VIII001698                     | SEL1              |
| TUB        | At1g25280 At1g76900                        | <b>Os11g06420 Os12g06630</b> |                                                                     | TUB               |
| TUB        | At1g61940 At2g47900                        | <b>Os03g22800 Os07g47110</b> | estExt_fgenes1_pg.v1.C.LG.X0225<br>fgenes1_pg.C.LG.VIII001778       | TUB               |
| TUB        |                                            | <b>Os01g64700 Os05g36190</b> | eugene3.00020634<br>fgenes1_pm.C.LG.V000374                         | TUB               |
| Unknown_1  | At3g53000                                  | <b>Os02g45320 Os04g48270</b> | fgenes1_pm.C.scaffold.28000105                                      | N (Unknown)       |
| Unknown_11 | At4g10925                                  | Os01g36940                   | eugene3.00031139<br>fgenes1_pg.C.LG.I000760                         | N (Unknown)       |
| Unknown_13 | At1g27340                                  | Os01g69940                   | estExt_Genewise1.v1.C.LG.I7714<br>fgenes1_pm.C.LG.III000563         | N (Unknown)       |
| Unknown_13 | At1g30950 UFO                              | Os06g45460                   | fgenes1_pg.C.LG.III000528<br>grail3.0029002001                      | N (Unknown)       |
| Unknown_13 | At3g61590 HWS                              | Os02g15950                   | eugene3.00140382<br>fgenes1_pm.C.LG.II000715                        | Kelch             |
| Unknown_13 | At4g33160                                  | Os03g28130 Os07g42590        | fgenes1_pg.C.LG.VI001490                                            | N (Unknown)       |
| Unknown_13 | At5g15710                                  | Os04g57290                   | eugene3.01550050<br>eugene3.01650022                                | N (Unknown)       |
| Unknown_13 | At5g42350 At5g42360                        | Os09g38300                   | eugene3.00051584                                                    | Kelch repeats     |
| Unknown_13 |                                            | Os02g41910 Os02g41930        | eugene3.00410164                                                    | N (Unknown)       |
| Unknown_3  | At4g00755                                  | Os03g64360                   | grail3.0035010801 grail3.0039000401                                 | N (Unknown)       |
| Unknown_4  |                                            | Os07g07520                   | fgenes1_pg.C.LG.VIII001571<br>estExt_fgenes1_pg.v1.C.LG.X0453       | N (Unknown)       |
| Unknown_5  | <b>At5g46170 At4g18380</b>                 | Os01g56390 Os05g43490        | eugene3.00100423<br>eugene3.00040307<br>eugene3.00110432            | N (Unknown)       |
| WD40       | At3g52030                                  | Os09g19720 Os11g07970        | eugene3.00091084                                                    | WD40              |
| zf-MYND    | At5g50450 At1g67340                        | Os01g69270 Os04g31610        | eugene3.00120908<br>fgenes1_pg.C.LG.XV000697                        | zf-MYND           |

Paired genes (BOLD) are those that were generated through segmental duplications.



**Table S2. Evolutionary change of the number of F-box proteins in extant and ancestral plants**

| Family     | Number of Genes in Species and Nodes |     |     |    |    | Number of genes gained/lost along branch |           |           |           |
|------------|--------------------------------------|-----|-----|----|----|------------------------------------------|-----------|-----------|-----------|
|            | Ath                                  | Ptr | Osa | N1 | N2 | N1 to N2                                 | N1 to Osa | N2 to Ath | N2 to Ptr |
| LRR_FBD.1  | 171                                  | 44  | 265 | 32 | 27 | 9/14                                     | 241/8     | 152/8     | 26/9      |
| Unknown.1  | 21                                   | 18  | 16  | 13 | 14 | 4/3                                      | 10/7      | 12/5      | 9/5       |
| LRR_ARM    | 2                                    | 4   | 1   | 2  | 4  | 2/0                                      | 0/1       | 0/2       | 1/1       |
| ACTIN      | 1                                    | 2   | 1   | 2  | 2  | 0/0                                      | 0/1       | 0/1       | 1/1       |
| Unknown.2  | 1                                    | 1   | 2   | 2  | 1  | 0/1                                      | 0/0       | 0/0       | 0/0       |
| JmjC       | 2                                    | 1   | 2   | 2  | 2  | 0/0                                      | 0/0       | 0/0       | 0/1       |
| DEXDc      | 1                                    | 1   | 1   | 1  | 1  | 0/0                                      | 0/0       | 0/0       | 0/0       |
| LRR_1      | 1                                    | 2   | 1   | 1  | 1  | 0/0                                      | 0/0       | 0/0       | 1/0       |
| WD40       | 2                                    | 2   | 3   | 4  | 3  | 0/1                                      | 1/2       | 0/1       | 0/1       |
| Unknown.3  | 1                                    | 2   | 1   | 1  | 1  | 0/0                                      | 0/0       | 0/0       | 1/0       |
| LRR_2      | 1                                    | 2   | 1   | 1  | 1  | 0/0                                      | 0/0       | 0/0       | 1/0       |
| LRR_3      | 2                                    | 4   | 5   | 3  | 2  | 0/1                                      | 2/0       | 0/0       | 2/0       |
| LysM       | 2                                    | 6   | 2   | 3  | 2  | 0/1                                      | 0/1       | 0/0       | 4/0       |
| Unknown.4  | 2                                    | 4   | 4   | 4  | 3  | 0/1                                      | 0/0       | 0/1       | 2/1       |
| LRR_4      | 2                                    | 2   | 2   | 1  | 1  | 0/0                                      | 1/0       | 1/0       | 1/0       |
| LRR_5      | 1                                    | 2   | 1   | 1  | 1  | 0/0                                      | 0/0       | 0/0       | 1/0       |
| SEL1       | 1                                    | 2   | 1   | 1  | 1  | 0/0                                      | 0/0       | 0/0       | 1/0       |
| DUF295.1   | 0                                    | 0   | 4   | 1  | 0  | 0/1                                      | 3/0       | 0/0       | 0/0       |
| LRR_FBD.2  | 0                                    | 0   | 3   | 1  | 0  | 0/1                                      | 2/0       | 0/0       | 0/0       |
| DUF295.2   | 4                                    | 2   | 0   | 1  | 2  | 1/0                                      | 0/1       | 2/0       | 1/1       |
| TUB        | 10                                   | 7   | 13  | 12 | 11 | 0/1                                      | 7/6       | 3/4       | 4/8       |
| DUF295.3   | 0                                    | 0   | 28  | 1  | 0  | 0/1                                      | 27/0      | 0/0       | 0/0       |
| DUF294.4   | 26                                   | 4   | 11  | 1  | 1  | 0/0                                      | 10/0      | 25/0      | 3/0       |
| Kelch.1    | 1                                    | 1   | 2   | 1  | 1  | 0/0                                      | 1/0       | 0/0       | 0/0       |
| LRR_6      | 10                                   | 4   | 21  | 10 | 8  | 1/3                                      | 15/4      | 4/2       | 0/4       |
| DUF295.5   | 16                                   | 12  | 73  | 12 | 11 | 5/6                                      | 63/2      | 10/5      | 4/3       |
| LRR_7      | 23                                   | 19  | 20  | 21 | 23 | 4/2                                      | 5/6       | 5/5       | 7/11      |
| Unknown.5  | 6                                    | 18  | 5   | 7  | 8  | 2/1                                      | 3/5       | 1/3       | 13/3      |
| Unknown.6  | 3                                    | 3   | 1   | 2  | 4  | 2/0                                      | 0/1       | 0/1       | 1/2       |
| Unknown.7  | 5                                    | 0   | 0   | 1  | 1  | 0/0                                      | 0/1       | 4/0       | 0/1       |
| zf_MYND    | 2                                    | 2   | 2   | 1  | 2  | 1/0                                      | 1/0       | 0/0       | 1/1       |
| Unknown.8  | 3                                    | 4   | 4   | 3  | 3  | 1/1                                      | 2/1       | 1/1       | 1/0       |
| PAC_Kelch  | 3                                    | 5   | 3   | 2  | 3  | 1/0                                      | 1/0       | 0/0       | 3/1       |
| Unknown.9  | 4                                    | 3   | 2   | 3  | 3  | 1/1                                      | 0/1       | 1/0       | 2/2       |
| Unknown.10 | 3                                    | 2   | 2   | 5  | 5  | 0/0                                      | 0/3       | 0/2       | 0/3       |
| LRR_8      | 1                                    | 1   | 1   | 1  | 1  | 0/0                                      | 0/0       | 0/0       | 0/0       |
| Unknown.11 | 17                                   | 13  | 6   | 9  | 13 | 5/1                                      | 2/5       | 7/3       | 3/3       |
| Unknown.12 | 6                                    | 12  | 1   | 3  | 7  | 4/0                                      | 0/2       | 0/1       | 6/1       |
| Unknown.13 | 9                                    | 13  | 186 | 17 | 10 | 0/7                                      | 169/0     | 1/2       | 4/1       |
| Kelch.2    | 93                                   | 29  | 23  | 30 | 32 | 6/4                                      | 7/14      | 67/6      | 9/12      |
| Kelch.3    | 1                                    | 2   | 1   | 1  | 1  | 0/0                                      | 0/0       | 0/0       | 1/0       |
| FBA        | 230                                  | 81  | 54  | 20 | 33 | 16/3                                     | 43/9      | 209/12    | 57/9      |

Ath, Arabidopsis; Ptr, poplar; Osa, rice; Node N1, MRCA of all three species; Node N2, MRCA of Arabidopsis and poplar.



Table S4. Characteristics of functionally studied F-box genes

| Name         | Full name                           | Family     | Locus number | Putative Ortholog      | Clade ratio | Functions                                                              | Ref.      |
|--------------|-------------------------------------|------------|--------------|------------------------|-------------|------------------------------------------------------------------------|-----------|
| ARP8         |                                     | ACTIN      | At5g56180    | Os04g57210             | 1:1         | nucleolar functions                                                    | 1         |
| CEG          | CEGenduo                            | FBA        | At3g22650    | None                   | 113:0       | negative regulator of auxin-mediated lateral root formation            | 2         |
| SON1         | Suppressor Of Nim1-1                | FBA        | At2g17310    | None                   | 113:0       | defense responses                                                      | 3         |
| ARF          | Attenuated Far-red Response         | Kelch_2    | At2g24540    | Os06g4450              | 1:1         | positive regulator of phytochrome A-mediated light signaling           | 4         |
| AtFBP7       |                                     | LRR_3      | At1g21760    | Os04g35190             | 1:1         | translation during temperature stress                                  | 5         |
| AtSKP2;1     |                                     | LRR_4      | At1g21410    | Os01g65920, Os05g35110 | 2:2         | photomorphogenesis                                                     | 6         |
| AtSKP2;2     |                                     | LRR_4      | At1g77000    | Os01g65920, Os05g35110 | 2:2         | photomorphogenesis                                                     | 6         |
| AFB1         | Auxin signaling F-Box protein 1     | LRR_7      | At4g03190    | Os04g32460             | 2:1         | auxin receptor; plant growth and development                           | 7         |
| AFB2         | Auxin signaling F-Box protein 2     | LRR_7      | At3g26810    | Os04g32460             | 3:1         | auxin receptor; plant growth and development; glucose repression       | 7         |
| AFB3         | Auxin signaling F-Box protein 3     | LRR_7      | At1g12820    | Os11g31620, Os02g52230 | 1:0         | auxin receptor; plant growth and development                           | 7         |
| AFB5         | Auxin signaling F-Box protein 5     | LRR_7      | At5g49980    | Os02g52230             | 2:1         | auxin receptor; plant growth and development                           | 8         |
| COI1         | Coronatine Insensitive 1            | LRR_7      | At2g39940    | Os01g63420, Os05g37690 | 1:2         | jasmonate-regulated defense responses; pollen fertility                | 9–14      |
| EBF1         | EIN3-Binding F-box protein 1        | LRR_7      | At2g25490    | Os02g10700, Os06g40360 | 2:2         | negative regulator of ethylene signaling; plant growth                 | 15, 18    |
| EBF2         | EIN3-Binding F-box protein 2        | LRR_7      | At5g25350    | Os02g10700, Os06g40360 | 2:2         | negative regulator of ethylene signaling; plant growth                 | 15, 18    |
| ORE9/ MAX2   | Oresara 9/More Axillary 2           | LRR_7      | At2g42620    | Os06g06050             | 1:1         | regulation of leaf senescence; selective repression of axillary shoots | 19, 22    |
| SKIP2/ VFB4  |                                     | LRR_7      | At5g67250    | Os09g02530             | 2:1         | plant growth and lateral root formation                                | 23        |
| TIR1         | Transport Inhibitor Response 1      | LRR_7      | At3g62980    | Os04g32460             | 2:1         | auxin receptor                                                         | 24, 30    |
| VFB1         |                                     | LRR_7      | At1g47056    | None                   | 2:0         | plant growth and lateral root formation                                | 23        |
| VFB2         |                                     | LRR_7      | At3g50080    | Os09g02530             | 2:1         | plant growth and lateral root formation                                | 23        |
| VFB3         |                                     | LRR_7      | At4g07400    | None                   | 2:0         | plant growth and lateral root formation                                | 23        |
| ARABIDILLO-1 |                                     | LRR_ARM    | At2g44900    | None                   | 2:0         | lateral root development                                               | 31        |
| ARABIDILLO-2 |                                     | LRR_ARM    | At3g60350    | None                   | 2:0         | lateral root development                                               | 31        |
| SNE          | SNEezy                              | LysM       | At5g48170    | Os03g10040 (GID2)      | 1:1         | positive regulator of Gillerellic acid signaling                       | 32, 34    |
| FKF1         | Flavin-binding Kelch-repeat F-box 1 | PAC_Kelch  | At1g68050    | Os11g34460             | 1:1         | circadian clock; photoperiodic-specific light signalling               | 35, 39    |
| LKP2         |                                     | PAC_Kelch  | At2g18915    | Os02g05700, Os06g47890 | 2:2         | circadian oscillator                                                   | 36, 40    |
| ZTL/ LKP1    | Zeitlupe                            | PAC_Kelch  | At5g57360    | Os02g05700, Os06g47890 | 2:2         | circadian clock; photomorphogenesis and flowering time                 | 40, 45    |
| SLY1         | SLepY 1                             | Unknown_11 | At4g24210    | None                   | 1:0         | positive regulator of Gillerellic acid signaling                       | 34, 46–48 |
| EID1         | Empfindlicher Im Dunkelrotenlicht 1 | Unknown_12 | At4g02440    | None                   | 1:0         | negative regulator of phytochrome A-specific light signaling           | 46, 49–51 |
| HWS          |                                     | Unknown_13 | At3g61590    | Os02g15950             | 1:1         | organ fusion and growth                                                |           |

| Name | Full name             | Family     | Locus number | Putative Ortholog | Clade ratio | Functions                                                           | Ref. |
|------|-----------------------|------------|--------------|-------------------|-------------|---------------------------------------------------------------------|------|
| UFO  | Unusual Floral Organs | Unknown_13 | At1g30950    | Os06g45460 (APO1) | 1:1         | patterning and growth in the floral meristem; floral organ identity |      |

- Kandasamy MK, McKinney EC, Meagher RB (2008) ACTIN-RELATED PROTEIN8 encodes an F-box protein localized to the nucleolus in Arabidopsis. *Plant Cell Physiol* 49:858–863.
- Dong L, et al. (2006) An auxin-inducible F-box protein CEGENDUO negatively regulates auxin-mediated lateral root formation in Arabidopsis. *Plant Mol Biol* 60:599–615.
- Kim HS, Delaney TP (2002) Arabidopsis SON1 is an F-box protein that regulates a novel induced defense response independent of both salicylic acid and systemic acquired resistance. *Plant Cell* 14:1469–1482.
- Harmon FG, Kay SA (2003) The F box protein AFR is a positive regulator of phytochrome A-mediated light signaling. *Curr Biol* 13:2091–2096.
- Calderon-Villalobos LI, et al. (2007) The evolutionarily conserved *Arabidopsis thaliana* F-box protein AtFBP7 is required for efficient translation during temperature stress. *Gene* 392:106–116.
- del Pozo JC, Boniotti MB, Gutierrez C (2002) Arabidopsis E2Fc functions in cell division and is degraded by the ubiquitin-SCF<sup>AtSKP2</sup> pathway in response to light. *Plant Cell* 14:3057–3071.
- Dharmasiri N, et al. (2005) Plant development is regulated by a family of auxin receptor F box proteins. *Dev Cell* 9:109–119.
- Walsh TA, et al. (2006) Mutations in an auxin receptor homolog AFB5 and in SGT1b confer resistance to synthetic picolinic auxins and not to 2,4-dichlorophenoxyacetic acid or indole-3-acetic acid in Arabidopsis. *Plant Physiol* 142:542–552.
- Xie DX, et al. (1998) COI1: an Arabidopsis gene required for jasmonate-regulated defense and fertility. *Science* 280:1091–1094.
- Xu L, et al. (2002) The SCF<sup>COI1</sup> ubiquitin-ligase complexes are required for jasmonate response in Arabidopsis. *Plant Cell* 14:1919–1935.
- Ellis C, Turner JG (2002) A conditionally fertile coi1 allele indicates cross-talk between plant hormone signalling pathways in *Arabidopsis thaliana* seeds and young seedlings. *Planta* 215:549–556.
- Devoto A, et al. (2002) COI1 links jasmonate signalling and fertility to the SCF ubiquitin-ligase complex in Arabidopsis. *Plant J* 32:457–466.
- Feng S, et al. (2003) The COP9 signalosome interacts physically with SCF<sup>COI1</sup> and modulates jasmonate responses. *Plant Cell* 15:1083–1094.
- Xiao S, et al. (2004) COS1: an Arabidopsis coronatine insensitive1 suppressor essential for regulation of jasmonate-mediated plant defense and senescence. *Plant Cell* 16:1132–1142.
- Guo H, Ecker JR (2003) Plant responses to ethylene gas are mediated by SCF<sup>EBF1/EBF2</sup>-dependent proteolysis of EIN3 transcription factor. *Cell* 115:667–677.
- Potuschak T, et al. (2003) EIN3-dependent regulation of plant ethylene hormone signaling by two Arabidopsis F box proteins: EBF1 and EBF2. *Cell* 115:679–689.
- Gagne JM, et al. (2004) Arabidopsis EIN3-binding F-box 1 and 2 form ubiquitin-protein ligases that repress ethylene action and promote growth by directing EIN3 degradation. *Proc Natl Acad Sci USA* 101:6803–6808.
- Binder BM, et al. (2007) The Arabidopsis EIN3 binding F-Box proteins EBF1 and EBF2 have distinct but overlapping roles in ethylene signaling. *Plant Cell* 19:509–523.
- Woo HR, et al. (2001) ORE9, an F-box protein that regulates leaf senescence in Arabidopsis. *Plant Cell* 13:1779–1790.
- Stirnberg P, van De Sande K, Leyser HM (2002) MAX1 and MAX2 control shoot lateral branching in Arabidopsis. *Development* 129:1131–1141.
- Shen H, Luong P, Huq E (2007) The F-box protein MAX2 functions as a positive regulator of photomorphogenesis in Arabidopsis. *Plant Physiol* 145:1471–1483.
- Stirnberg P, Furner IJ, Ottoline Leyser HM (2007) MAX2 participates in an SCF complex which acts locally at the node to suppress shoot branching. *Plant J* 50:80–94.
- Schwager KM, et al. (2007) Characterization of the *VIER F-BOX PROTEINE* genes from Arabidopsis reveals their importance for plant growth and development. *Plant Cell* 19:1163–1178.
- Ruegger M, et al. (1998) The TIR1 protein of Arabidopsis functions in auxin response and is related to human SKP2 and yeast grr1p. *Genes Dev* 12:198–207.
- Gray WM, et al. (1999) Identification of an SCF ubiquitin-ligase complex required for auxin response in *Arabidopsis thaliana*. *Genes and Development* 13:1678–1691.
- Xie Q, Frugis G, Colgan D, Chua NH (2000) Arabidopsis NAC1 transduces auxin signal downstream of TIR1 to promote lateral root development. *Genes Dev* 14:3024–3036.
- Gray WM, et al. (2001) Auxin regulates SCF<sup>TIR1</sup>-dependent degradation of AUX/IAA proteins. *Nature* 414:271–276.
- Dharmasiri N, Dharmasiri S, Estelle M (2005) The F-box protein TIR1 is an auxin receptor. *Nature* 435:441–445.
- Kepinski S, Leyser O (2005) The Arabidopsis F-box protein TIR1 is an auxin receptor. *Nature* 435:446–451.
- Tan X, et al. (2007) Mechanism of auxin perception by the TIR1 ubiquitin ligase. *Nature* 446:640–645.
- Coates JC, Laplaze L, Haseloff J (2006) Armadillo-related proteins promote lateral root development in Arabidopsis. *Proc Natl Acad Sci USA* 103:1621–1626.
- Sasaki A, et al. (2003) Accumulation of phosphorylated repressor for gibberellin signaling in an F-box mutant. *Science* 299:1896–1898.
- Gomi K, et al. (2004) GID2, an F-box subunit of the SCF E3 complex, specifically interacts with phosphorylated SLR1 protein and regulates the gibberellin-dependent degradation of SLR1 in rice. *Plant J* 37:626–634.
- Strader LC, et al. (2004) Recessive-interfering mutations in the gibberellin signaling gene *SLEEPY1* are rescued by overexpression of its homologue, *SNEEZY*. *Proc Natl Acad Sci USA* 101:12771–12776.
- Nelson MK, et al. (2000) An F-Box/WD40 repeat-containing protein important for Dictyostelium cell-type proportioning, slug behaviour, and culmination. *Dev Biol* 224:42–59.
- Yasuhara M, et al. (2004) Identification of ASK and clock-associated proteins as molecular partners of LKP2 (LOV kelch protein 2) in Arabidopsis. *J Exp Bot* 55:2015–2027.
- Imaizumi T, et al. (2005) FKF1 F-box protein mediates cyclic degradation of a repressor of *CONSTANS* in Arabidopsis. *Science* 309:293–297.
- Zikihara K, et al. (2006) Photoreaction cycle of the light, oxygen, and voltage domain in FKF1 determined by low-temperature absorption spectroscopy. *Biochemistry* 45:10828–10837.
- Sawa M, Nusinow DA, Kay SA, Imaizumi T (2007) FKF1 and GIGANTEA complex formation is required for day-length measurement in Arabidopsis. *Science* 318:261–265.
- Fukamatsu Y, et al. (2005) Identification of LOV KELCH PROTEIN2 (LKP2)-interacting factors that can recruit LKP2 to nuclear bodies. *Plant Cell Physiol* 46:1340–1349.
- Somers DE, Schultz TF, Milnamo M, Kay SA (2000) *ZEITLUPE* encodes a novel clock-associated PAS protein from Arabidopsis. *Cell* 101:319–329.
- Han L, et al. (2004) Formation of an SCF<sup>ZTL</sup> complex is required for proper regulation of circadian timing. *Plant J* 40:291–301.
- Somers DE, Kim WY, Geng R (2004) The F-box protein ZEITLUPE confers dosage-dependent control on the circadian clock, photomorphogenesis, and flowering time. *Plant Cell* 16:769–782.
- Kim WY, Hicks KA, Somers DE (2005) Independent roles for EARLY FLOWERING 3 and ZEITLUPE in the control of circadian timing, hypocotyl length, and flowering time. *Plant Physiol* 139:1557–1569.
- Kim WY, et al. (2007) ZEITLUPE is a circadian photoreceptor stabilized by GIGANTEA in blue light. *Nature* 449:356–360.
- Dieterle M, et al. (2001) EID1, an F-box protein involved in phytochrome A-specific light signaling. *Genes Dev* 15:939–944.
- Dill A, et al. (2004) The Arabidopsis F-box protein SLEEPY1 targets gibberellin signaling repressors for gibberellin-induced degradation. *Plant Cell* 16:1392–1405.
- Fu X, et al. (2004) The Arabidopsis mutant sleepy1gar2–1 protein promotes plant growth by increasing the affinity of the SCF<sup>SLEEPY1</sup> E3 ubiquitin ligase for DELLA protein substrates. *Plant Cell* 16:1406–1418.
- Okamoto H, Qu L, Deng XW (2001) Does EID1 aid the fine-tuning of phytochrome A signal transduction in Arabidopsis? *Plant Cell* 13:1983–1986.
- Zhou YC, Dieterle M, Buche C, Kretsch T (2002) The negatively acting factors EID1 and SPA1 have distinct functions in phytochrome A-specific light signaling. *Plant Physiol* 128:1098–1108.
- Marrocco K, et al. (2006) Functional analysis of EID1, an F-box protein involved in phytochrome A-dependent light signal transduction. *Plant J* 45:423–438.
- Gonzalez-Carranza ZH, et al. (2007) Hawaiian skirt: an F-box gene that regulates organ fusion and growth in Arabidopsis. *Plant Physiol* 144:1370–1382.
- Samach A, et al. (1999) The *UNUSUAL FLORAL ORGANS* gene of *Arabidopsis thaliana* is an F-box protein required for normal patterning and growth in the floral meristem. *Plant J* 20:433–445.
- Zhao D, Yang M, Solava J, Ma H (1999) The *ASK1* gene regulates development and interacts with the *UFO* gene to control floral organ identity in Arabidopsis. *Dev Genet* 25:209–223.
- Zhao D, Yu Q, Chen M, Ma H (2001) The *ASK1* gene regulates B function gene expression in cooperation with *UFO* and *LEAFY* in Arabidopsis. *Development* 128:2735–2746.
- Durfee T, et al. (2003) The F-box-containing protein UFO and AGAMOUS participate in antagonistic pathways governing early petal development in Arabidopsis. *Proc Natl Acad Sci USA* 100:8571–8576.
- Wang X, et al. (2003) The COP9 signalosome interacts with SCF<sup>UFO</sup> and participates in Arabidopsis flower development. *Plant Cell* 15:1071–1082.
- Ni W, et al. (2004) Regulation of flower development in Arabidopsis by SCF complexes. *Plant Physiol* 134:1574–1585.
- Hepworth SR, Klenz JE, Houghn GW (2006) UFO in the Arabidopsis inflorescence apex is required for floral-meristem identity and bract suppression. *Planta* 223:769–778.
- Ikedo K, et al. (2007) Rice *ABERRANT PANICLE ORGANIZATION 1*, encoding an F-box protein, regulates meristem fate. *Plant J* 51:1030–1040.
- Chae E, Tan QK, Hill TA, Irish VF (2008) An Arabidopsis F-box protein acts as a transcriptional co-factor to regulate floral development. *Development* 135:1235–1245.

## Other Supporting Information Files

[Dataset S1 \(TXT\)](#)
